# Supplementary figures and images for: Genome-Wide Exploration of the Ethylene-Responsive Element-Binding Factor Gene Family in Sweet Cherry (Prunus avium L.): Preliminarily Unveiling Insights into Normal Development and Fruit Cracking
Source: MDPI journal article supplement (doi:10.3390/horticulturae10030247), 2024-03-03

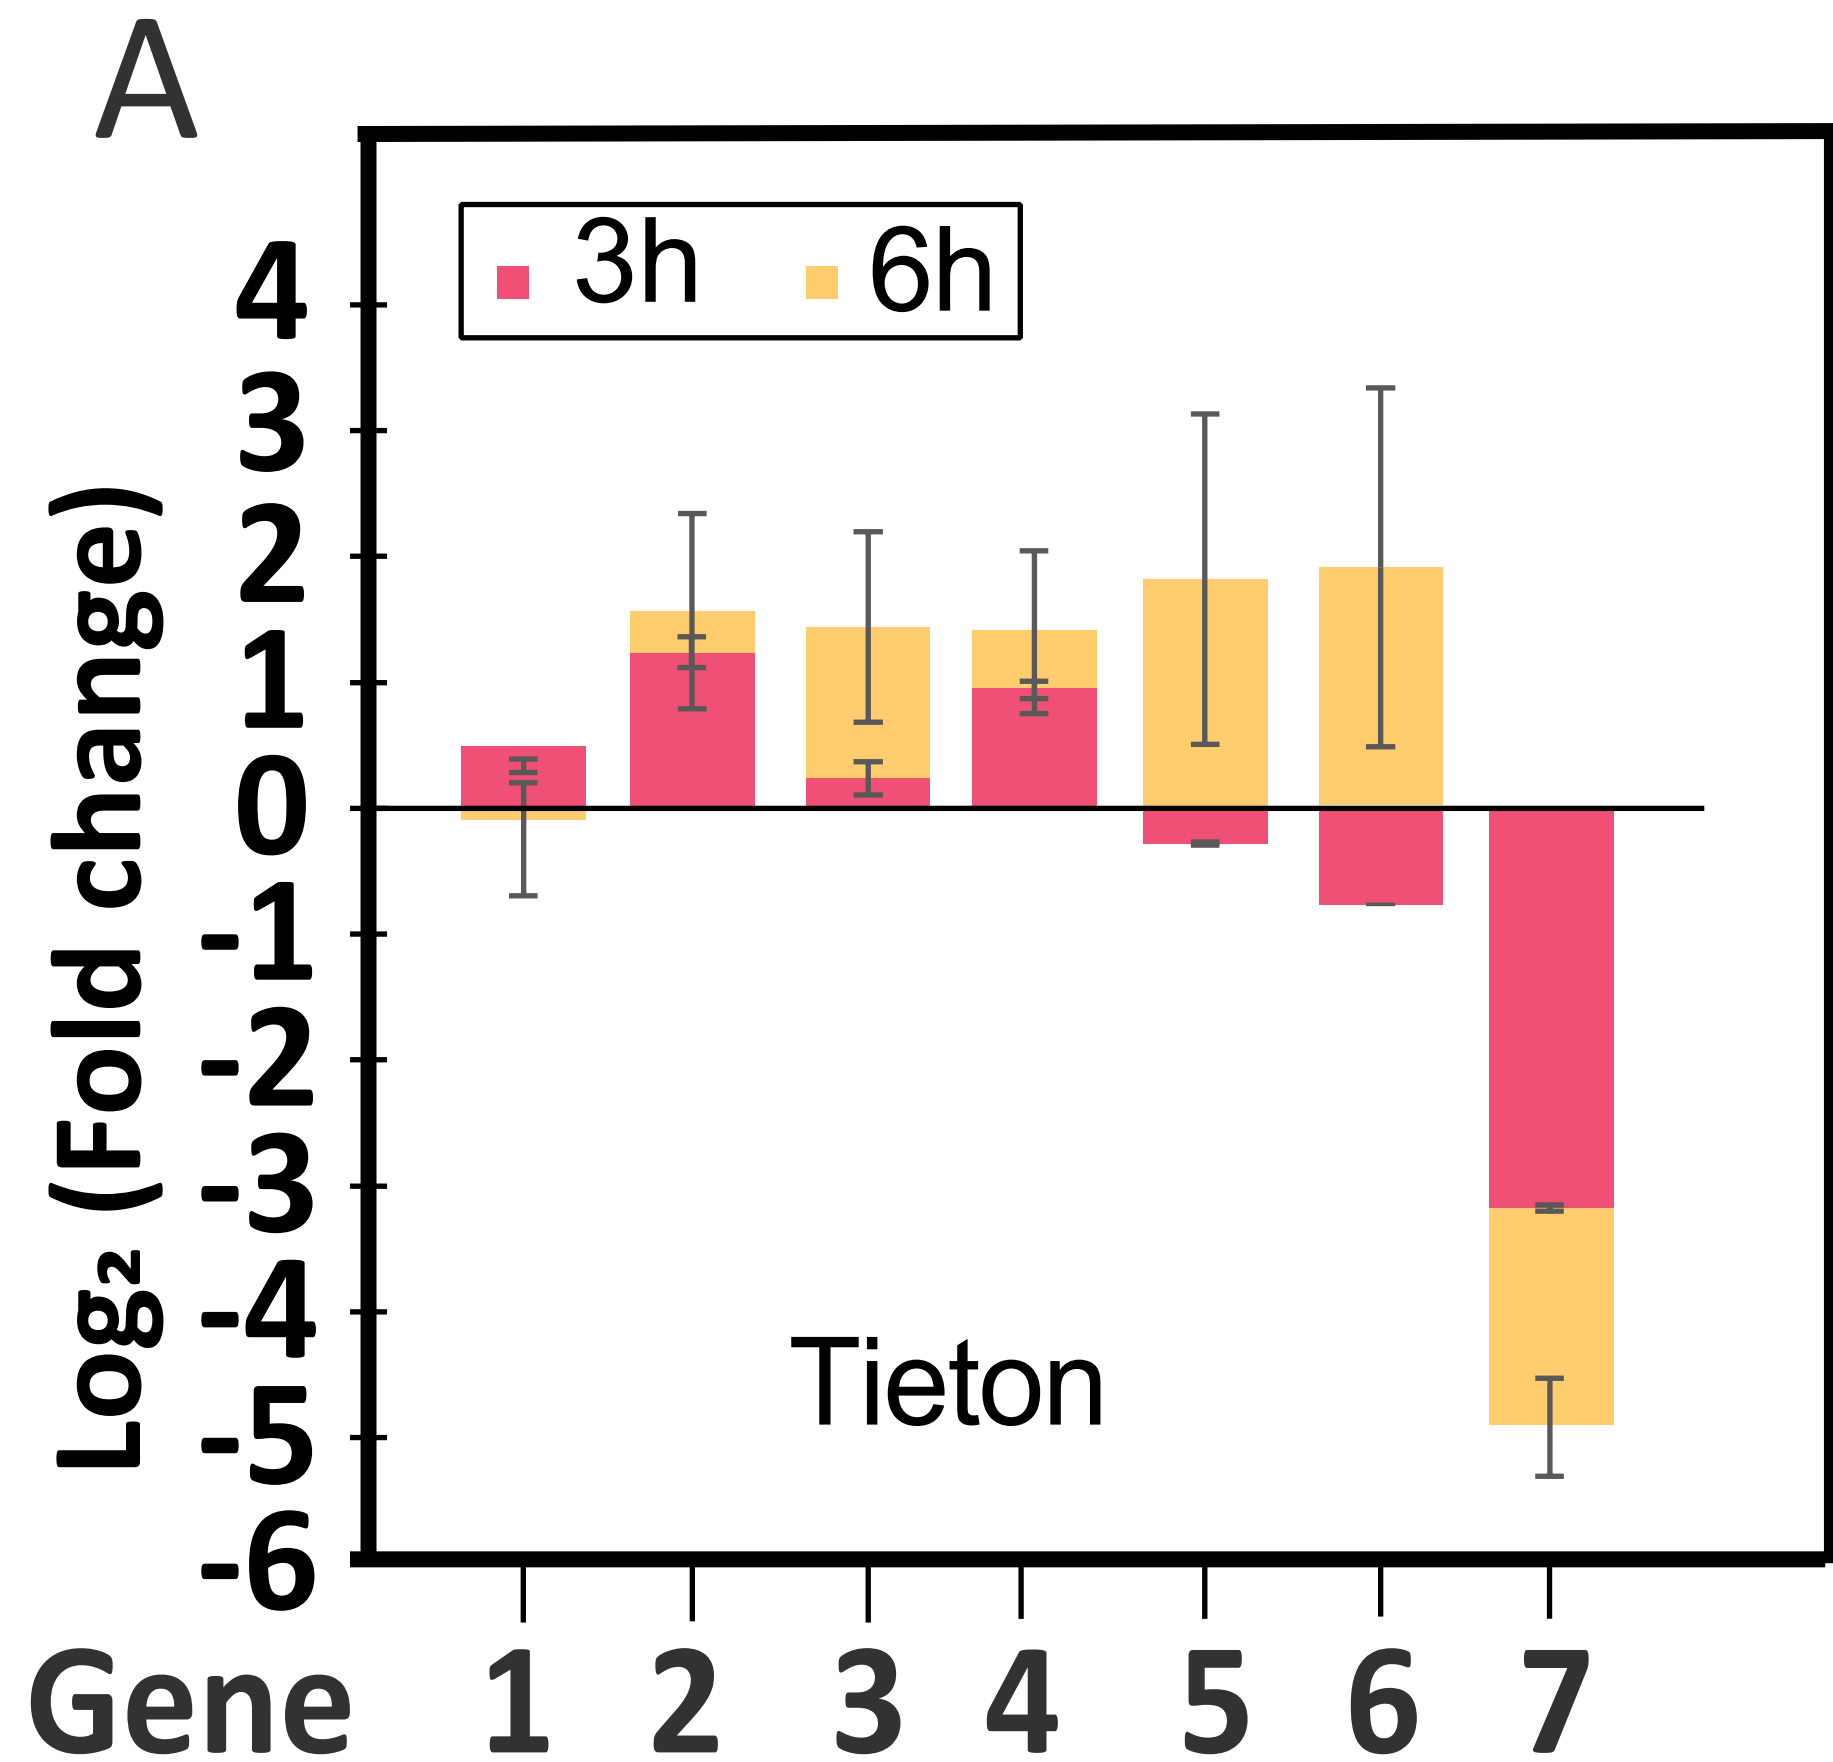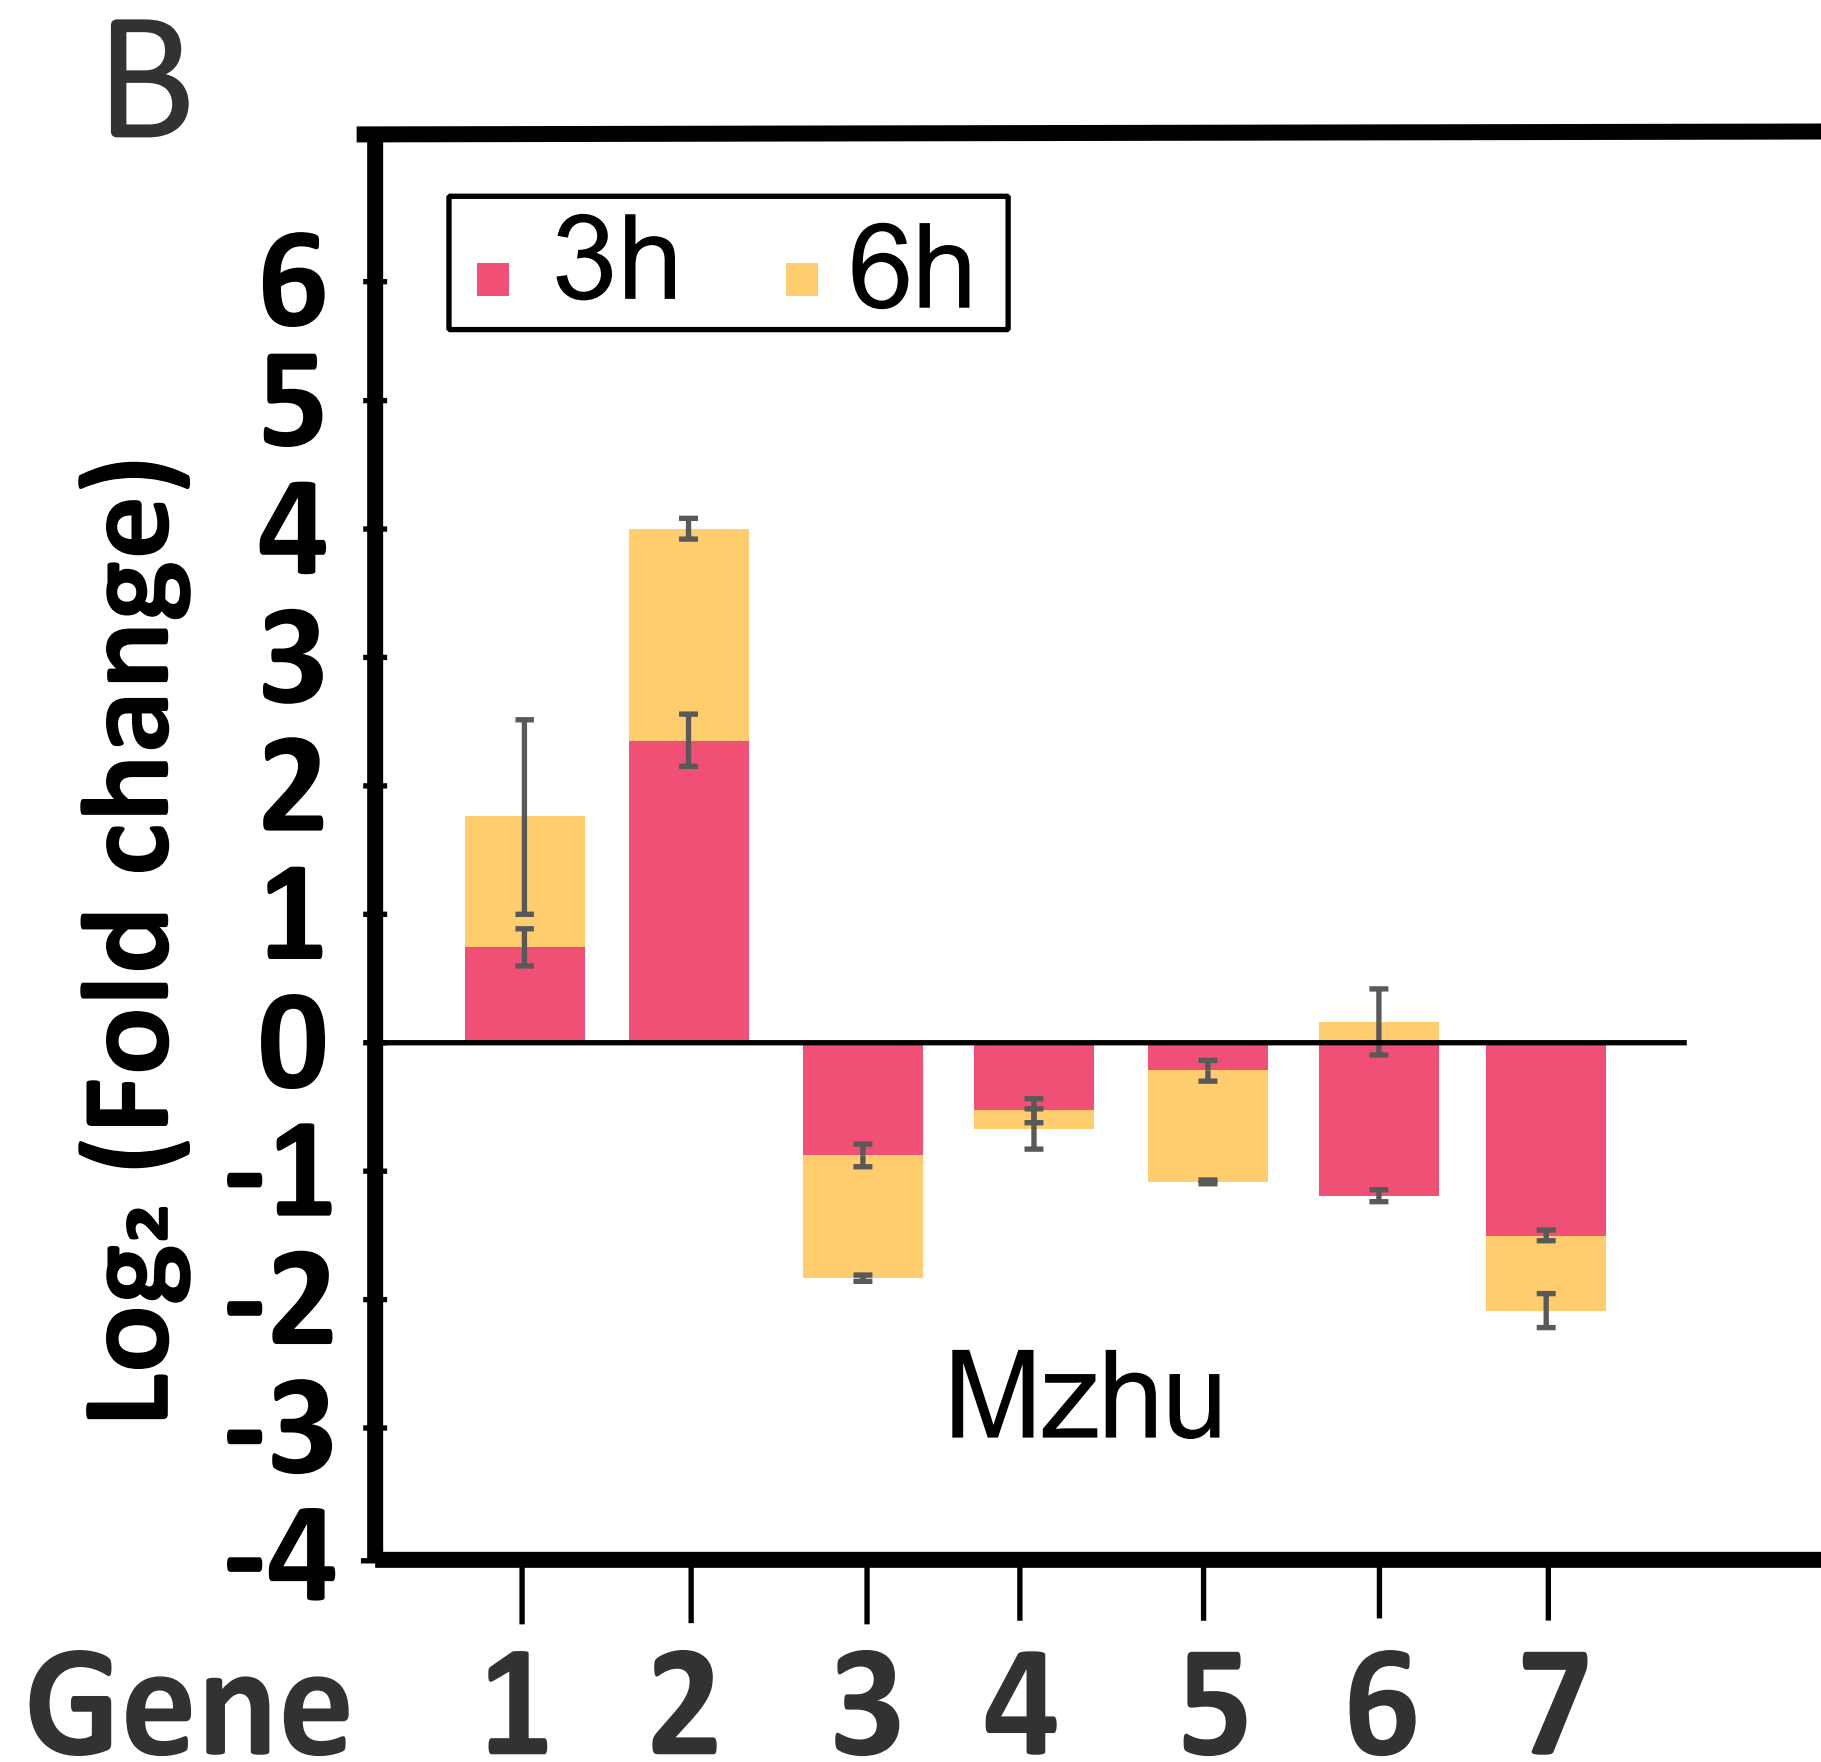

Supplement: s1 [file s1]

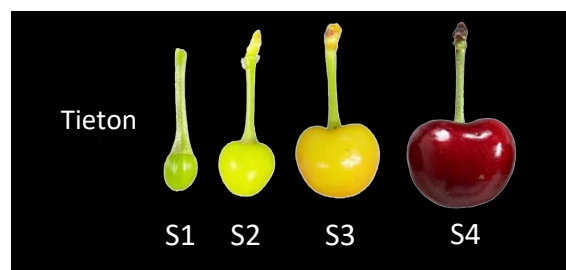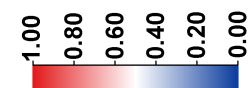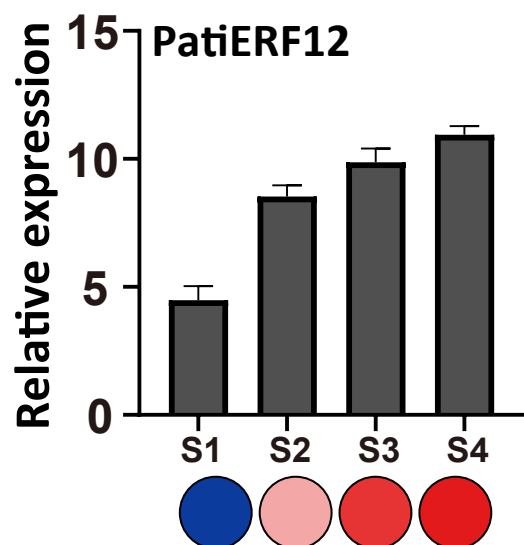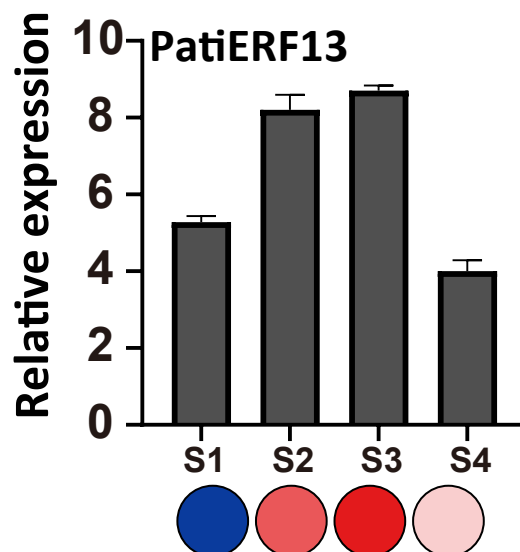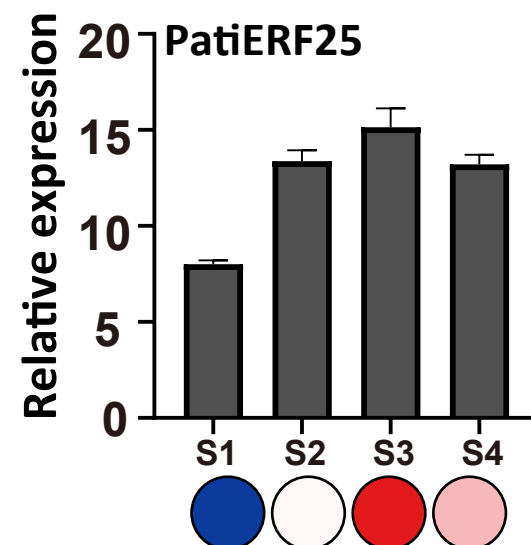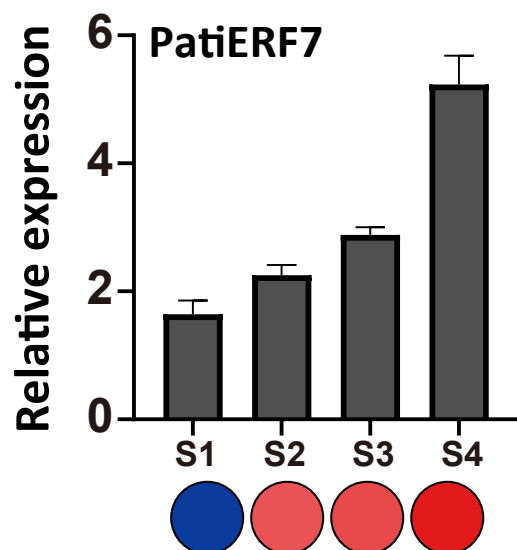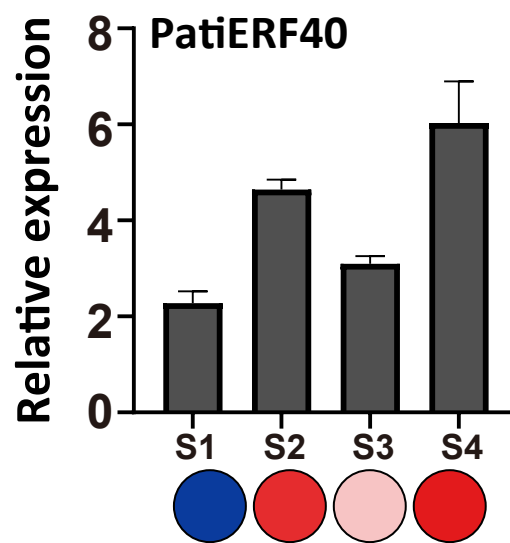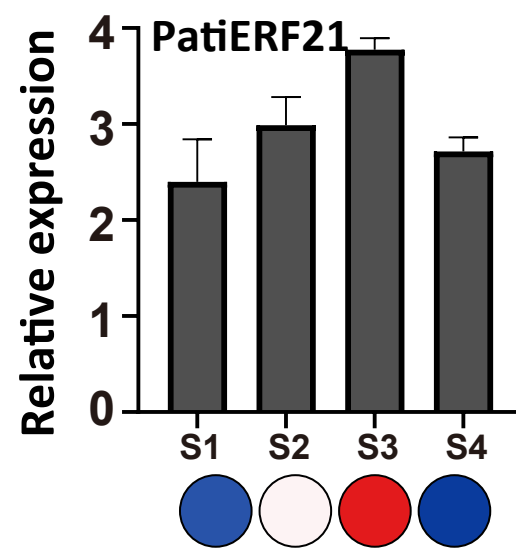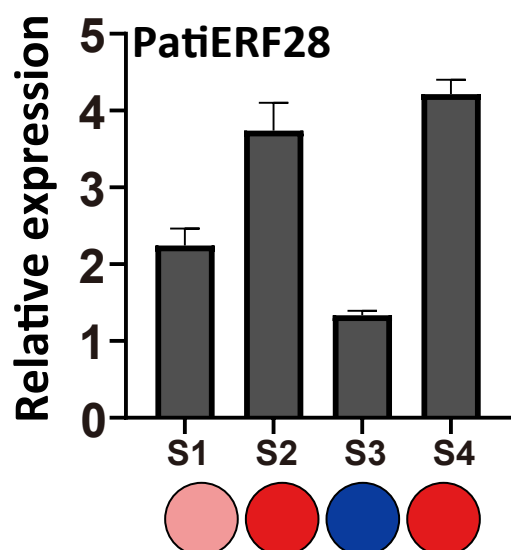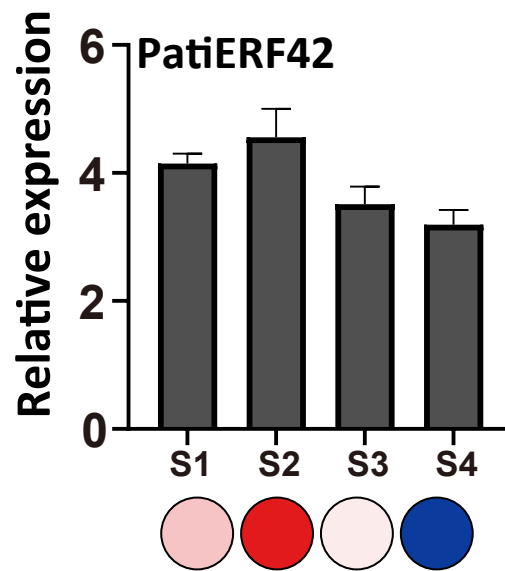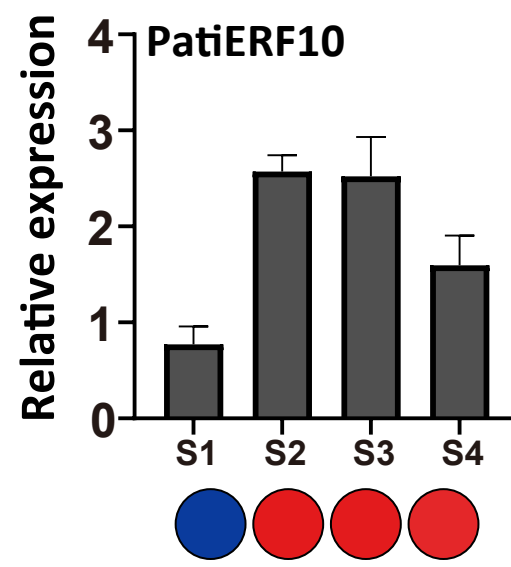

Supplement: s1 [file s1]
